# Supplementary material for: Volatile Compounds and Biological Activity of the Essential Oil of Aloysia citrodora Paláu: Comparison of Hydrodistillation and Microwave-Assisted Hydrodistillation
Source: MDPI journal article supplement (doi:10.3390/molecules28114528), 2023-06-02
Supplement: s1 [file s1]

# **Volatile compounds and biological activity of the essential oil of *Aloysia citrodora* Paláu: comparison of hydrodistillation and microwave assisted hydrodistillation**

Rafael M. Sprea<sup>1,2</sup>, Luís H. M. Fernandes<sup>1,2</sup>, Tânia C. S. P. Pires<sup>1,2</sup>, Ricardo C. Calhelha<sup>1,2</sup>, Pedro J. Rodrigues<sup>2,3</sup> and Joana S. Amaral<sup>1,2,\*</sup>

<sup>1</sup> Centro de Investigação de Montanha (CIMO), Instituto Politécnico de Bragança, Campus de Santa Apolónia, 5300-253 Bragança, Portugal

<sup>2</sup> Laboratório Associado para a Sustentabilidade e Tecnologia em Regiões de Montanha (SusTEC), Instituto Politécnico de Bragança, Campus de Santa Apolónia, 5300-253 Bragança, Portugal

<sup>3</sup> Research Center in Digitalization and Intelligent Robotics (CeDRI), Instituto Politécnico de Bragança, Bragança, 5300-253, Portugal Affiliation 1; e-mail@e-mail.com

\* Correspondence: jamaral@ipb.pt; Tel.: +351-273-303219

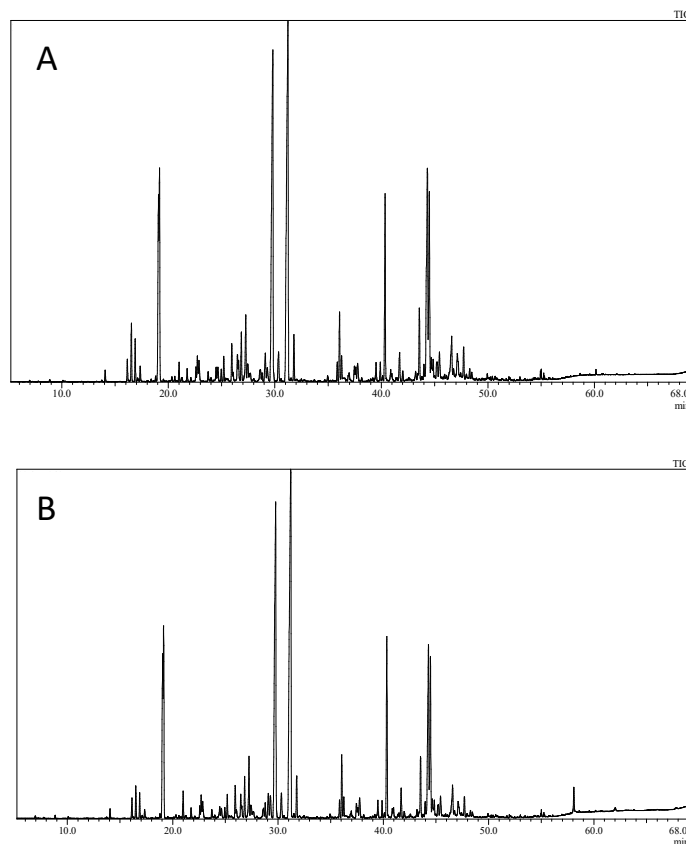

**Figure S1.** GC-MS chromatograms of *A. citrodora* essential oils obtained by Clevenger (A) and microwave (B) hydrodistillation methods.
